# Supplementary material for: A 9.2-GHz clock transition in a Lu(II) molecular spin qubit arising from a 3,467-MHz hyperfine interaction
Source: Springer Nature journal article supplement (doi:10.1038/s41557-022-00894-4), 2022-03-14

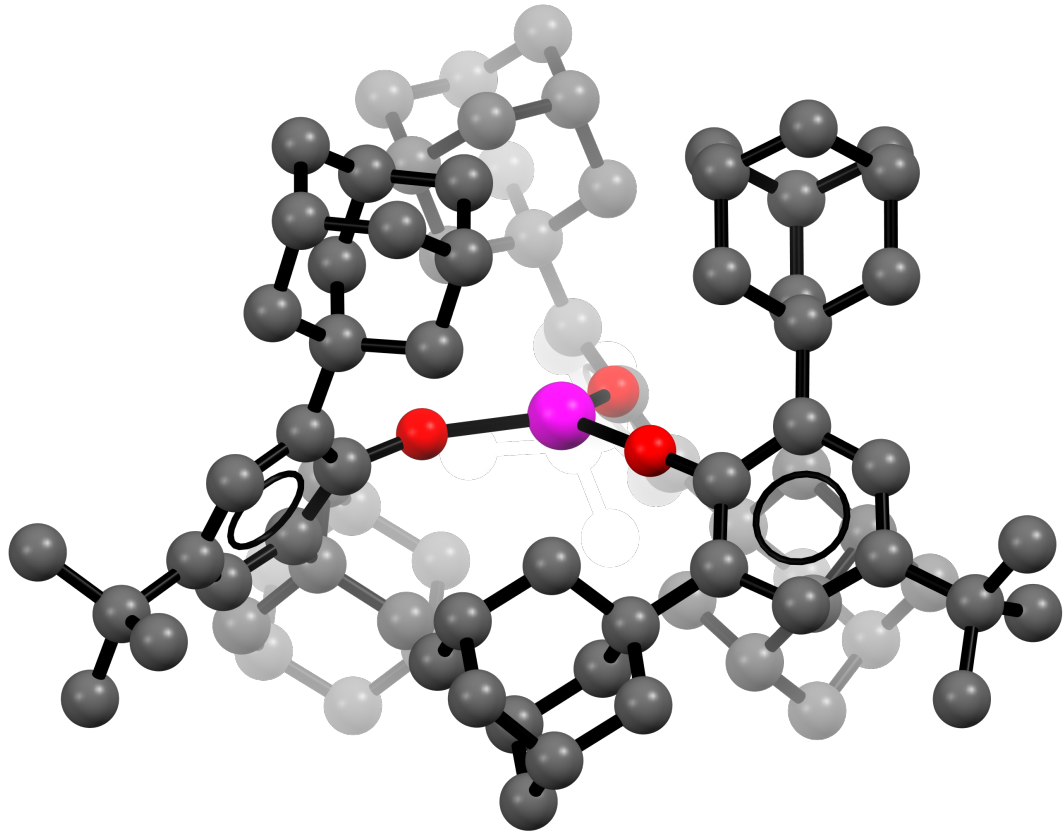

Supplement: 41557_2022_894_MOESM5_ESM.pdf [file 41557_2022_894_MOESM5_ESM.pdf]
